# Supplementary material for: Transition-metal-free aerobic oxidation of primary alcohols to carboxylic acids
Source: Royal Society of Chemistry journal article supplement (doi:10.1039/c3nj00045a), 2013-01-01
Supplement: c3nj00045a.pdf [file c3nj00045a.pdf]

# Supporting Information

## Transition-Metal-Free Aerobic Oxidation of Primary Alcohols to Carboxylic Acids

*Jing Wang,<sup>a</sup> Chao Liu,<sup>a</sup> Jiwen Yuan,<sup>a</sup> Aiwen Lei<sup>\*a,b</sup>*

<sup>a</sup> College of Chemistry and Molecular Sciences Wuhan University, Wuhan 430072, P.  
R. China

<sup>b</sup> Lanzhou Institute of Chemical Physics Chinese Academy of Sciences, Lanzhou  
730000, P. R. China.

E-mail: [aiwenlei@whu.edu.cn](mailto:aiwenlei@whu.edu.cn)

**General information.....S2**

**General procedure and further remarks.....S3**

**Copies of all compounds <sup>1</sup>H NMR and <sup>13</sup>C NMR..... S8**

**References.....S19**

### General information

All reactions were performed in an air atmosphere with a balloon fitted on a Schlenk tube. All glassware was oven dried at 110 °C for hours and cooled down under vacuum. Unless otherwise noted, materials were obtained from commercial suppliers and used without further purification. Thin layer chromatography (TLC) employed glass 0.25 mm silica gel plates.  $^1\text{H}$  and  $^{13}\text{C}$  NMR data were recorded with Varian Mercury (300 or 400 MHz) spectrometers with tetramethylsilane as an internal standard. All chemical shifts ( $\delta$ ) are reported in ppm and coupling constants ( $J$ ) in Hz. All chemical shifts are reported relative to tetramethylsilane and *d*-solvent peaks, respectively.

### General Procedure for NaOH Promoted Oxidation of Primary Alcohols

A 10 mL Schlenk tube was charged with 1.0 mmol of NaOH. After the tube was backfilled with air balloon, 0.5 mmol of primary alcohol and 2 mL of THF were injected. The resulting solution was kept stirring for 12 h at 60 °C and then the suspended solution was quenched with water and extracted with ethyl acetate ( $3 \times 10$  mL). The aqueous layer was acidified with diluted hydrochloride (2 mL, 2M) and extracted with ethyl acetate ( $3 \times 10$  mL). The organic layers were combined and dried over sodium sulfate. The pure product was obtained by removing the organic solvent.

### General Procedure for <sup>t</sup>BuONa Promoted Oxidation of Primary Alcohols

A 10 mL schlenk flask was charged with 1.0 mmol of <sup>t</sup>BuONa. After the tube was backfilled with air balloon, 0.5 mmol of primary alcohol and 2 mL of THF were injected. The resulting solution was kept stirring for 1 h at 25 °C and then the suspended solution was quenched with water and extracted with ethyl acetate ( $3 \times 10$  mL). The aqueous layer was acidified with diluted hydrochloride (2 mL, 2M) and extracted with ethyl acetate ( $3 \times 10$  mL). The organic layers were combined and dried over sodium sulfate. The pure product was obtained by removing the organic solvent.

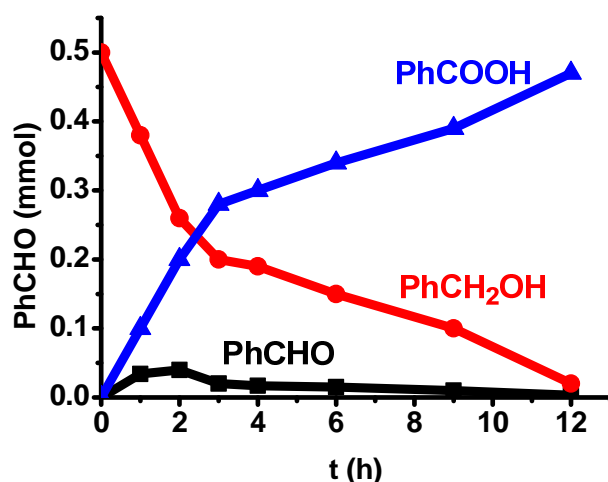

Figure 1. Distribution versus time in the oxidation of benzyl alcohol with 2.0 equiv NaOH at 60 °C.

### Procedure for NaOH Promoted Oxidation of benzaldehyde

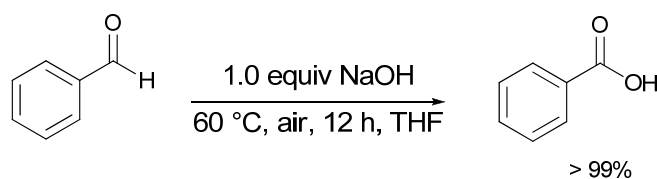

A 10 mL Schlenk tube was charged with NaOH (20.0 mg, 0.5 mmol). After the tube was backfilled with air balloon, benzaldehyde (53.1 mg, 0.5 mmol) and 2 mL of THF were injected. The resulting solution was kept stirring for 12 h at 60 °C and then the suspended solution was quenched with water and extracted with ethyl acetate (3 × 10 mL). The aqueous layer was acidified with diluted hydrochloride (2 mL, 2M) and extracted with ethyl acetate (3 × 10 mL). The organic layers were combined and dried over sodium sulfate. The pure product was obtained by removing the organic solvent. The yield of the isolated product was >99%.

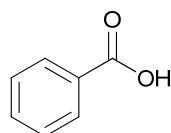

**Benzoic acid (2a)<sup>1</sup>.** Compound **2a** was prepared following the general procedure starting from benzyl alcohol (54.1 mg, 0.50 mmol). **2a** was isolated as a white solid (61 mg, > 99%). <sup>1</sup>H NMR (400 MHz, CDCl<sub>3</sub>) δ 12.39 (b, 1H), 8.12 (d, *J* = 8.0 Hz, 2H), 7.60 (t, *J* = 8.0 Hz, 1H), 7.47 (t, *J* = 8.0 Hz, 2H) ppm; <sup>13</sup>C NMR (100 MHz, CDCl<sub>3</sub>) δ 172.6, 133.8, 130.2, 129.3, 128.5 ppm.

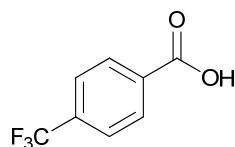

**4-Trifluoromethylbenzoic acid (2b)<sup>2</sup>.** Compound **2b** was prepared following the general procedure starting from 4-Trifluoromethylbenzyl alcohol (88.1 mg, 0.50 mmol). **2b** was isolated as a white solid (85.5 mg, 90%). <sup>1</sup>H NMR (300 MHz, DMSO) δ 9.48 (d, *J* = 8.1 Hz, 2H), 9.17 (d, *J* = 8.1 Hz, 2H) ppm; <sup>13</sup>C NMR (75 MHz, DMSO) δ 171.7, 140.1, 138.0, 135.5, 130.9 ppm.

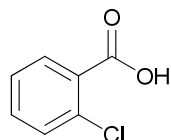

**2-Chlorobenzoic acid (2c)<sup>3</sup>.** Compound **2c** was prepared following the general procedure starting from 2-chlorobenzyl alcohol (71.3 mg, 0.50 mmol). **2c** was isolated as a brown solid (54.3 mg, 70%). <sup>1</sup>H NMR (400 MHz, DMSO) δ 7.79 (d, *J* = 8.0 Hz, 1H), 7.53 (m, 2H), 7.43 (m, 1H) ppm; <sup>13</sup>C NMR (100 MHz, DMSO) δ 167.2, 133.0, 132.0, 131.9, 131.3, 131.1, 127.7 ppm.

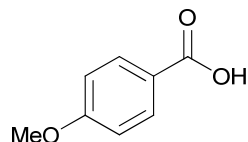

**4-Methoxybenzoic acid (2d)<sup>1</sup>.** Compound **2d** was prepared following the general procedure starting from 4-methoxybenzyl alcohol (69.1 mg, 0.50 mmol). **2d** was isolated as a white solid (52.4 mg, 69%). <sup>1</sup>H NMR (300 MHz, CDCl<sub>3</sub>) δ 8.00 (s, 2H), 7.26 (s, 2H), 2.43 (s, 3H) ppm; <sup>13</sup>C NMR (75 MHz, CDCl<sub>3</sub>) δ 172.6, 144.8, 130.4,

129.4, 126.7, 21.9 ppm.

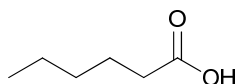

**Hexanoic acid (2e)**<sup>4</sup>. Compound **2e** was prepared following the general procedure starting from 1-hexanol (51.1 mg, 0.50 mmol). **2e** was isolated as a colorless liquid (29.0 mg, 50%). <sup>1</sup>H NMR (300 MHz, CDCl<sub>3</sub>) δ 10.14 (b, 1H), 2.29 (s, 2H), 1.56 (s, 2H), 1.25 (s, 4H), 0.84 (s, 3H) ppm; <sup>13</sup>C NMR (75 MHz, CDCl<sub>3</sub>) δ 180.8, 34.3, 31.4, 24.6, 22.5, 14.1 ppm.

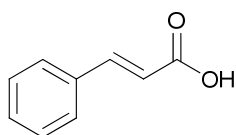

**Cinnamic acid (2f)**<sup>1</sup>. Compound **2f** was prepared following the general procedure starting from cinnamyl alcohol (67.1 mg, 0.50 mmol). **2f** was isolated as a brown solid (35.5 mg, 47%). <sup>1</sup>H NMR (400 MHz, CDCl<sub>3</sub>) δ 7.81 (d, *J* = 16.0 Hz, 1H), 7.56 (m, 2H), 7.41 (m, 3H), 6.46 (d, 1H) ppm; <sup>13</sup>C NMR (100 MHz, CDCl<sub>3</sub>) δ 172.6, 147.1, 134.0, 130.7, 129.0, 128.4, 117.3 ppm.

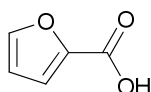

**2-Furoic acid (2g)**<sup>2</sup>. Compound **2g** was prepared following the general procedure starting from 2-furan methanol (49.1 mg, 0.50 mmol). **2g** was isolated as a colorless liquid (35.3 mg, 63%). <sup>1</sup>H NMR (300 MHz, CDCl<sub>3</sub>) δ 9.31 (b, 1H), 7.68 – 7.62 (m, 1H), 7.34 (d, *J* = 3.5 Hz, 1H), 6.56 (dd, *J* = 3.5, 1.7 Hz, 1H) ppm; <sup>13</sup>C NMR (75 MHz, CDCl<sub>3</sub>) δ 163.7, 147.6, 143.9, 120.3, 112.4 ppm.

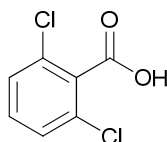

**2,6-Dichlorobenzoic acid (2h)**<sup>1</sup>. Compound **2h** was prepared following the general procedure starting from 2,6-dichlorobenzyl alcohol (88.5 mg, 0.50 mmol). **2h** was isolated as a brown solid (95.5 mg, > 99%). <sup>1</sup>H NMR (400 MHz, DMSO) δ 7.81 (d, *J* = 8.0 Hz, 1H), 7.69 (d, *J* = 4.0 Hz, 1H), 7.50 (dd, *J*<sub>1</sub> = *J*<sub>2</sub> = 4.0 Hz, 1H) ppm; <sup>13</sup>C

NMR (100 MHz, DMSO)  $\delta$  166.3, 137.0, 133.5, 132.8, 130.7, 130.5, 127.9 ppm.

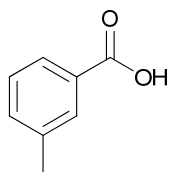

**3-Methylbenzoic acid (2i)**<sup>5</sup>. Compound **2i** was prepared following the general procedure starting from 3-methylbenzyl alcohol (61.1 mg, 0.50 mmol). **2i** was isolated as a white solid (53.1 mg, 78%). <sup>1</sup>H NMR (300 MHz, CDCl<sub>3</sub>)  $\delta$  7.93 (d,  $J$  = 7.1 Hz, 2H), 7.40 (m, 2H), 2.43 (s, 3H). <sup>13</sup>C NMR (75 MHz, CDCl<sub>3</sub>)  $\delta$  172.7, 138.4, 134.7, 130.8, 129.3, 128.5, 127.5, 21.4 ppm.

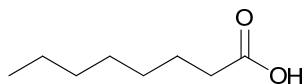

**Octanoic acid (2j)**<sup>6</sup>. Compound **2j** was prepared following the general procedure starting from 1-octanol (65.1 mg, 0.50 mmol). **2j** was isolated as a colorless liquid (39.6 mg, 55%). <sup>1</sup>H NMR (400 MHz, CDCl<sub>3</sub>)  $\delta$  2.35 (t,  $J$  = 8.0 Hz, 2H), 1.64 (t,  $J$  = 8.0 Hz, 2H), 1.35-1.28 (m, 8H), 0.88 (m, 3H) ppm; <sup>13</sup>C NMR (100 MHz, CDCl<sub>3</sub>)  $\delta$  180.1, 34.1, 31.6, 29.0, 28.9, 24.7, 22.6, 14.1 ppm.

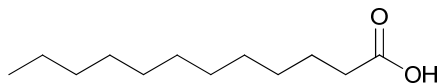

**Dodecanoic acid (2k)**<sup>7</sup>. Compound **2k** was prepared following the general procedure starting from 1-dodecanol (93.2 mg, 0.50 mmol). **2k** was isolated as a white solid (55.0 mg, 55%). <sup>1</sup>H NMR (300 MHz, CDCl<sub>3</sub>)  $\delta$  9.38 (b, 1H), 2.33 (t,  $J$  = 7.2 Hz, 2H), 1.62 (t,  $J$  = 6.6 Hz, 2H), 1.25 (s, 16H), 0.87 (m, 3H) ppm; <sup>13</sup>C NMR (75 MHz, CDCl<sub>3</sub>)  $\delta$  180.7, 34.3, 32.1, 29.8, 29.6, 29.5, 29.3, 24.9, 22.9, 14.3 ppm.

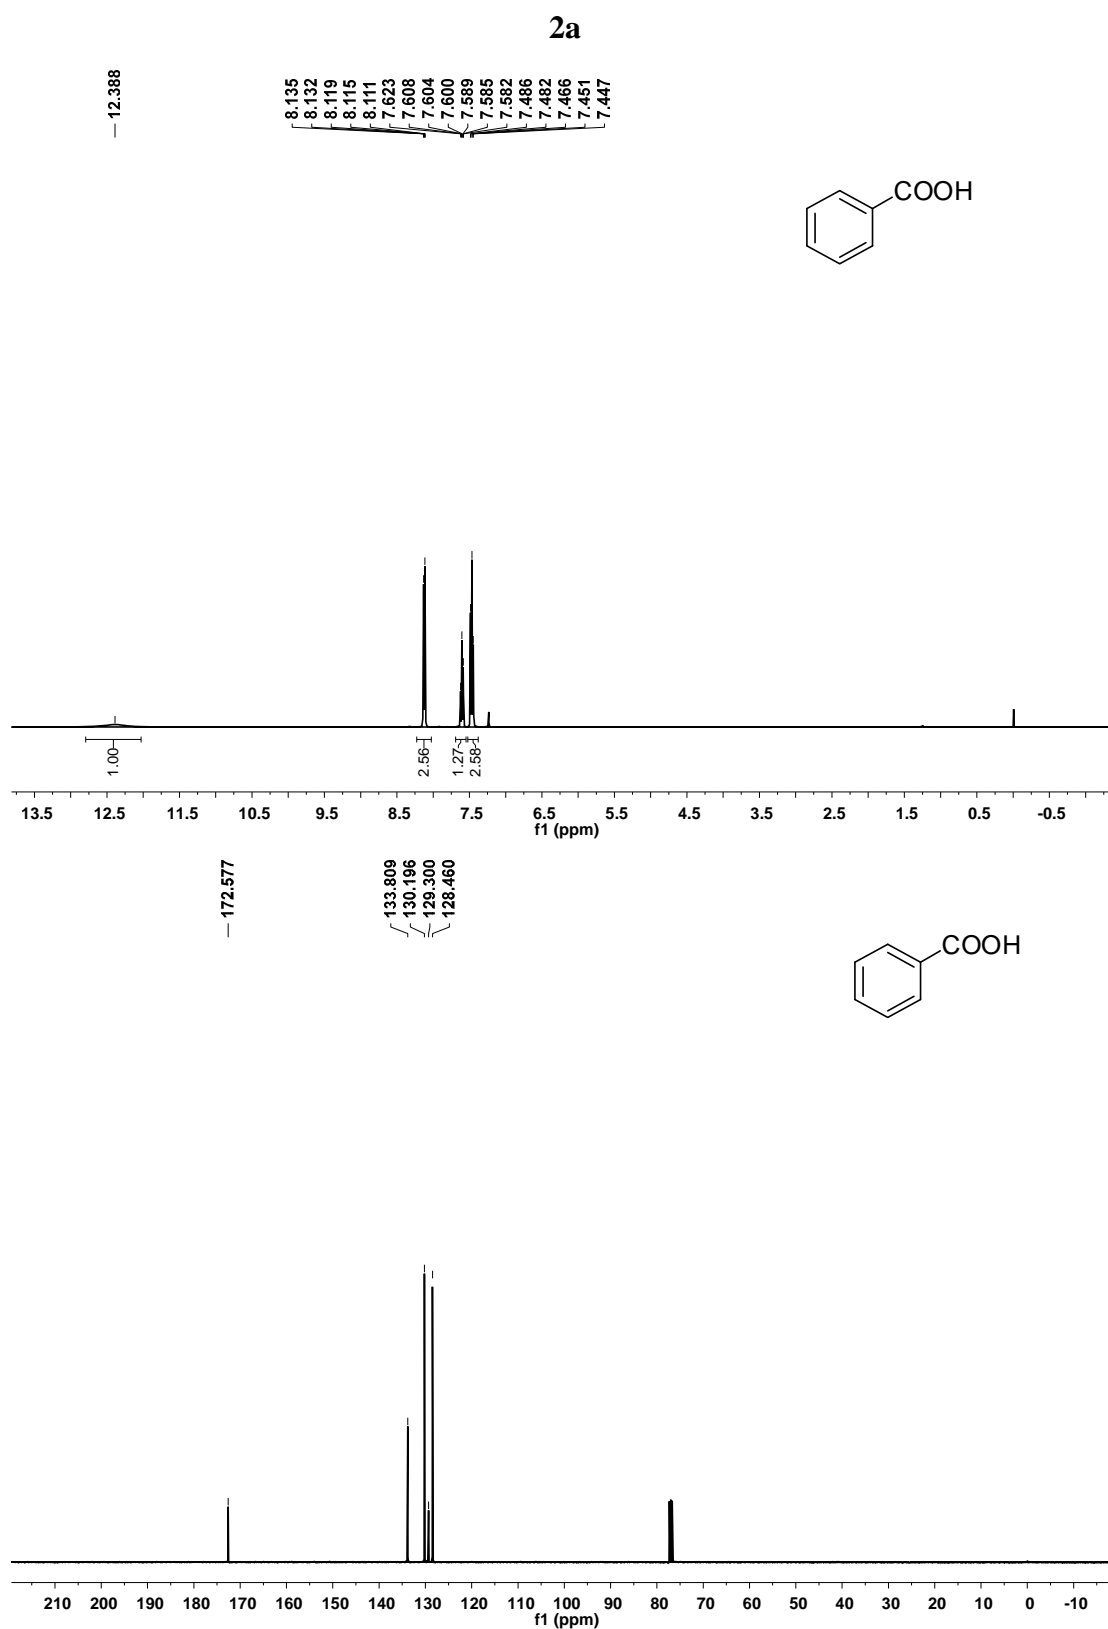

**2b**

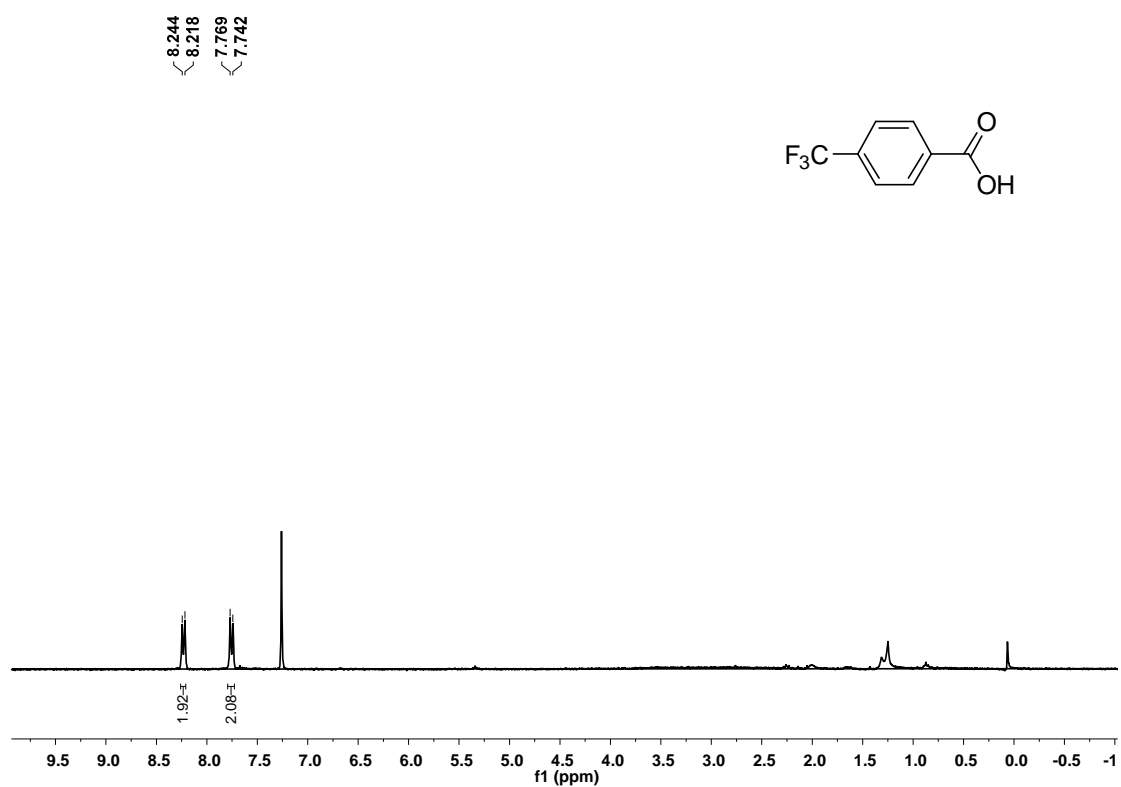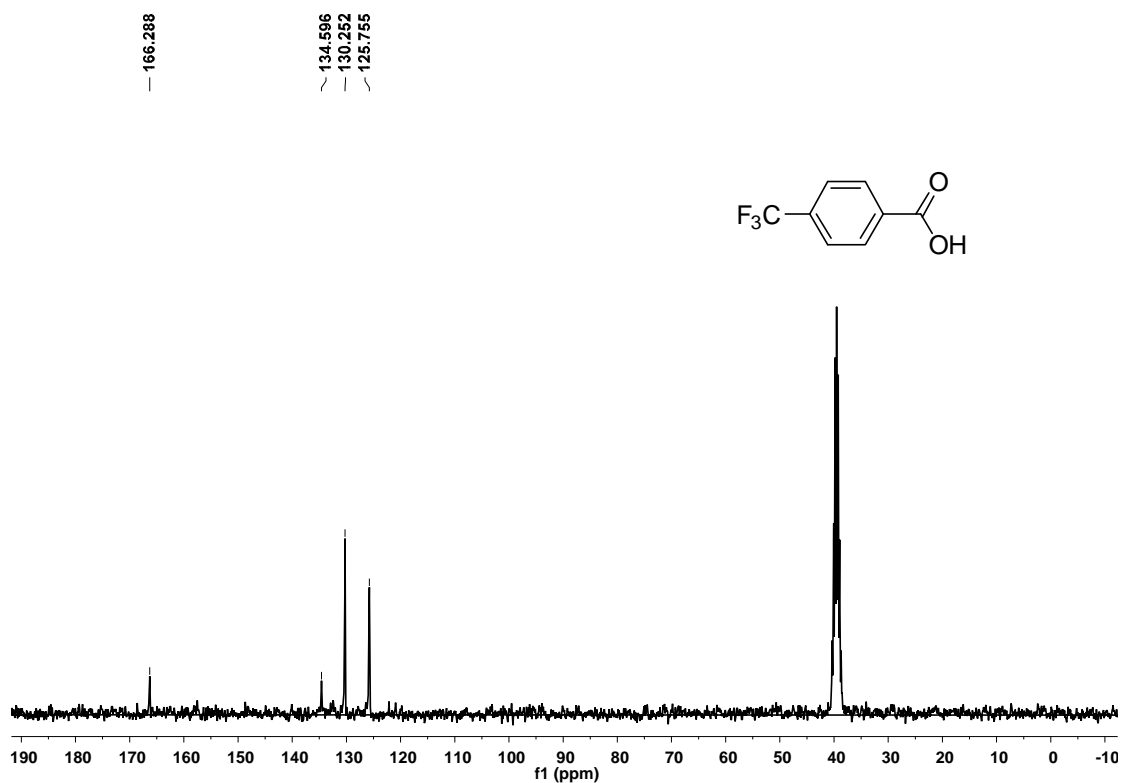

**2c**

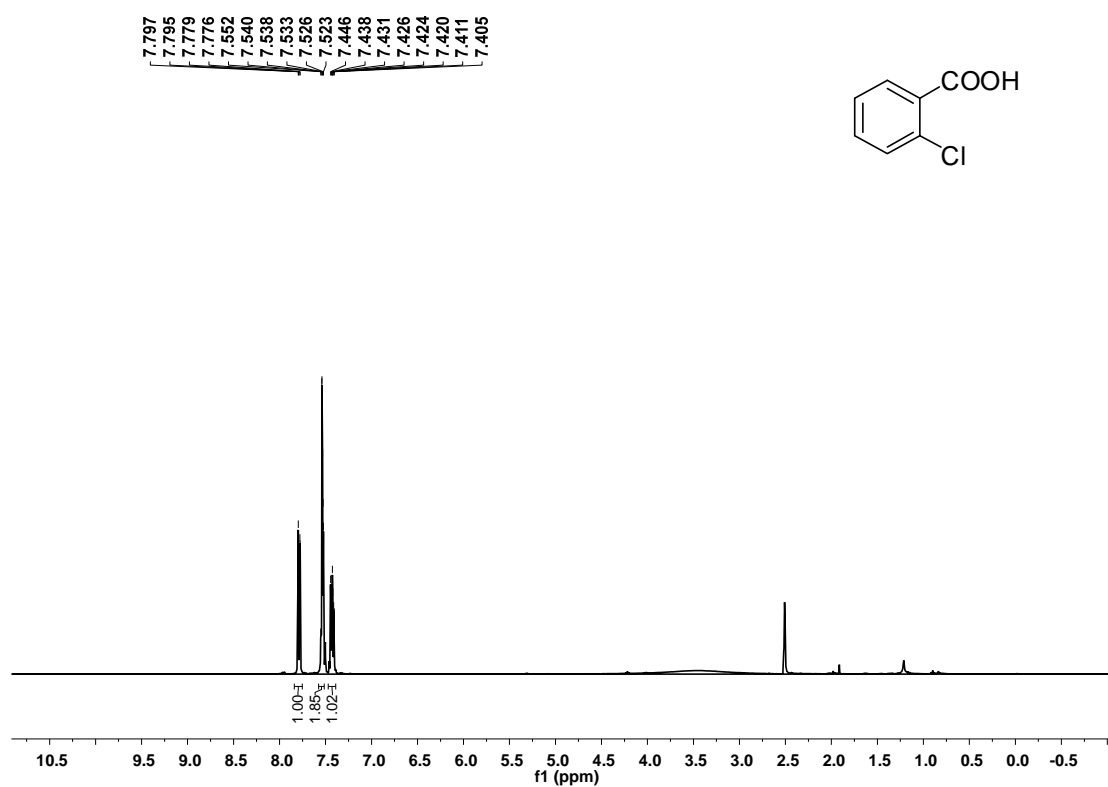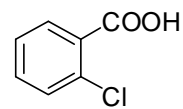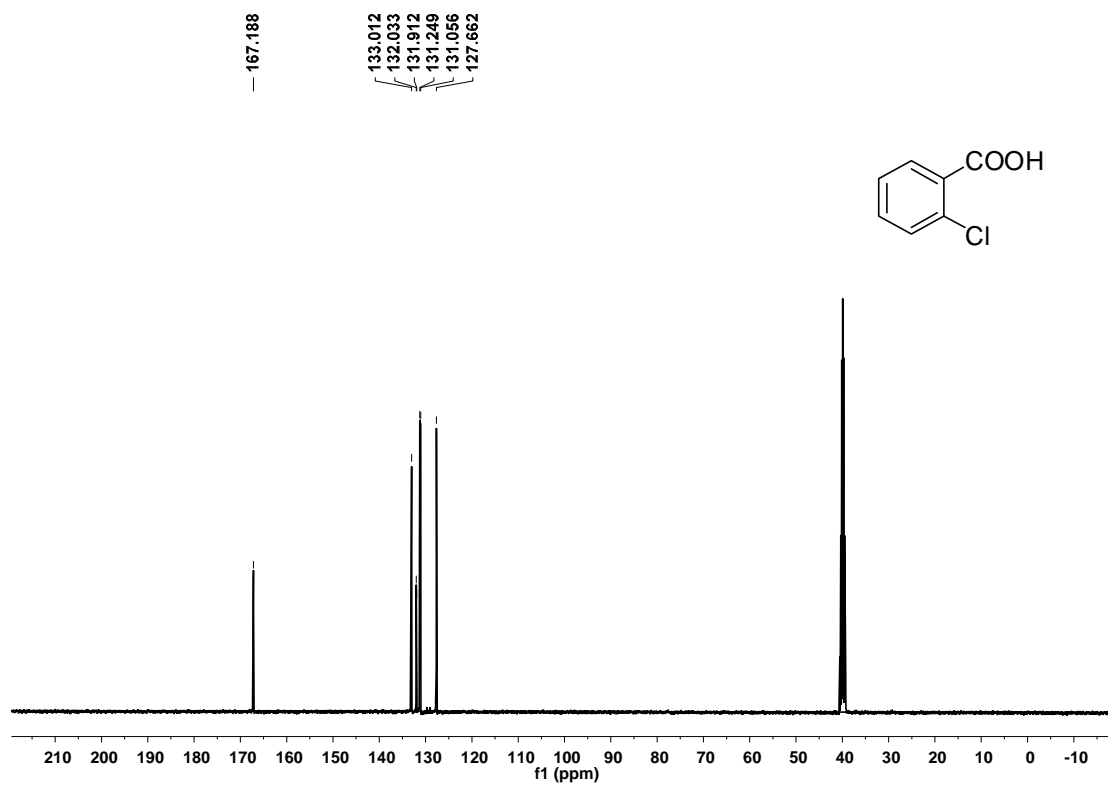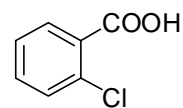

**2d**

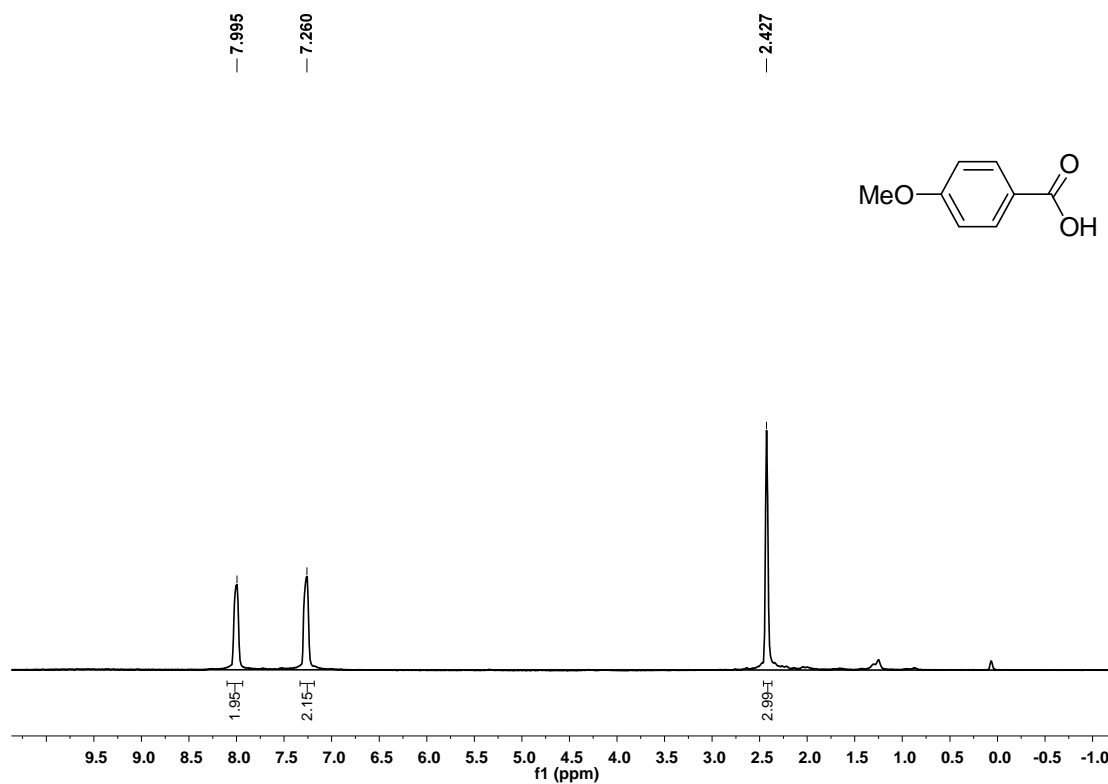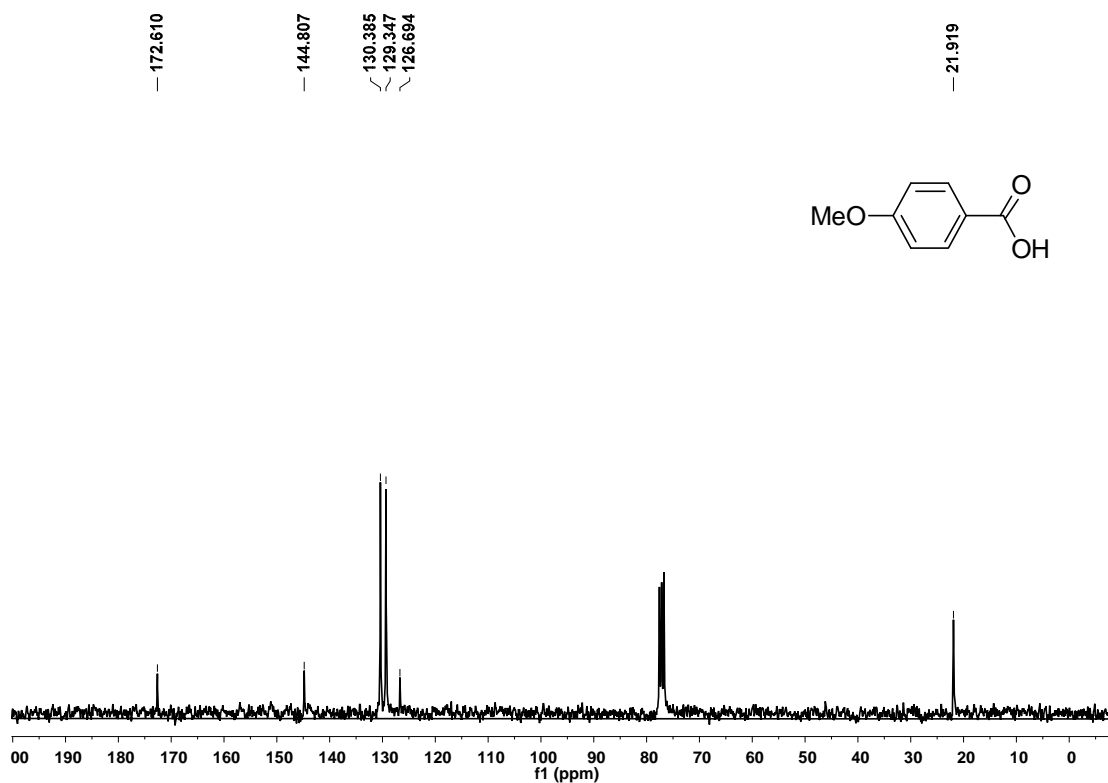

2e

WJ-6-61-2

C<sub>5</sub>H<sub>11</sub>COOH

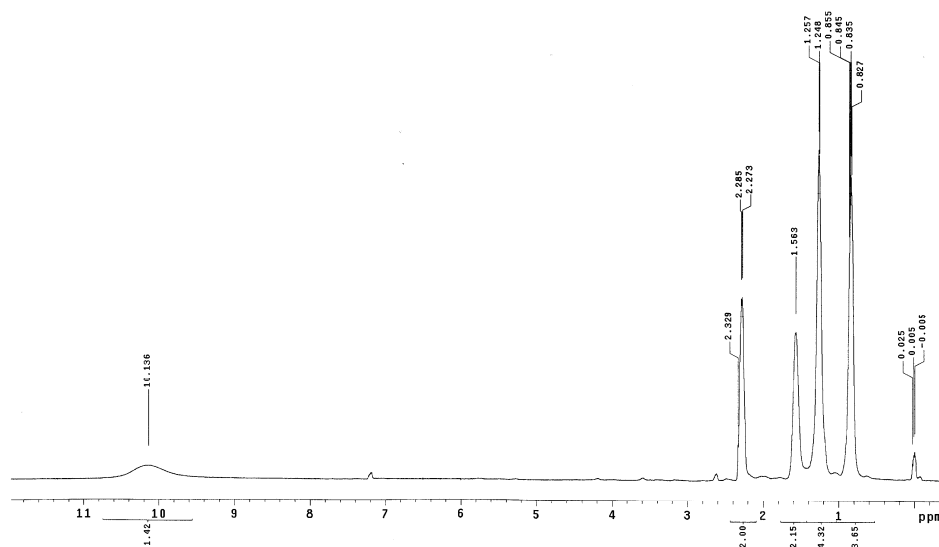

WJ-6-61-2.c

Solvent: CDCl<sub>3</sub>  
Ambient temperature  
Mercury-300B5 "mercury300"  
Relax. delay 1.000 sec  
Pulse 23.0 degrees  
Acq. time 0.500 sec  
Width 17241.4 Hz  
58 repetitions  
OBSERVE C13, 75.4552576 MHz  
DECOUPLE H1, 300.0821962 MHz  
Power 40 dB  
Continuously on  
WALTZ-16 modulated  
DATA PROCESSING  
Line broadening 4.0 Hz  
FT size 32768  
Total time 28 min, 8 sec

C<sub>5</sub>H<sub>11</sub>COOH

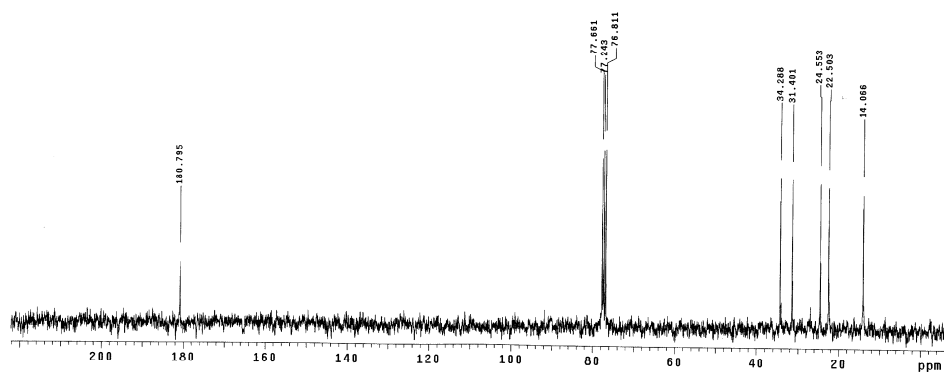

**2f**

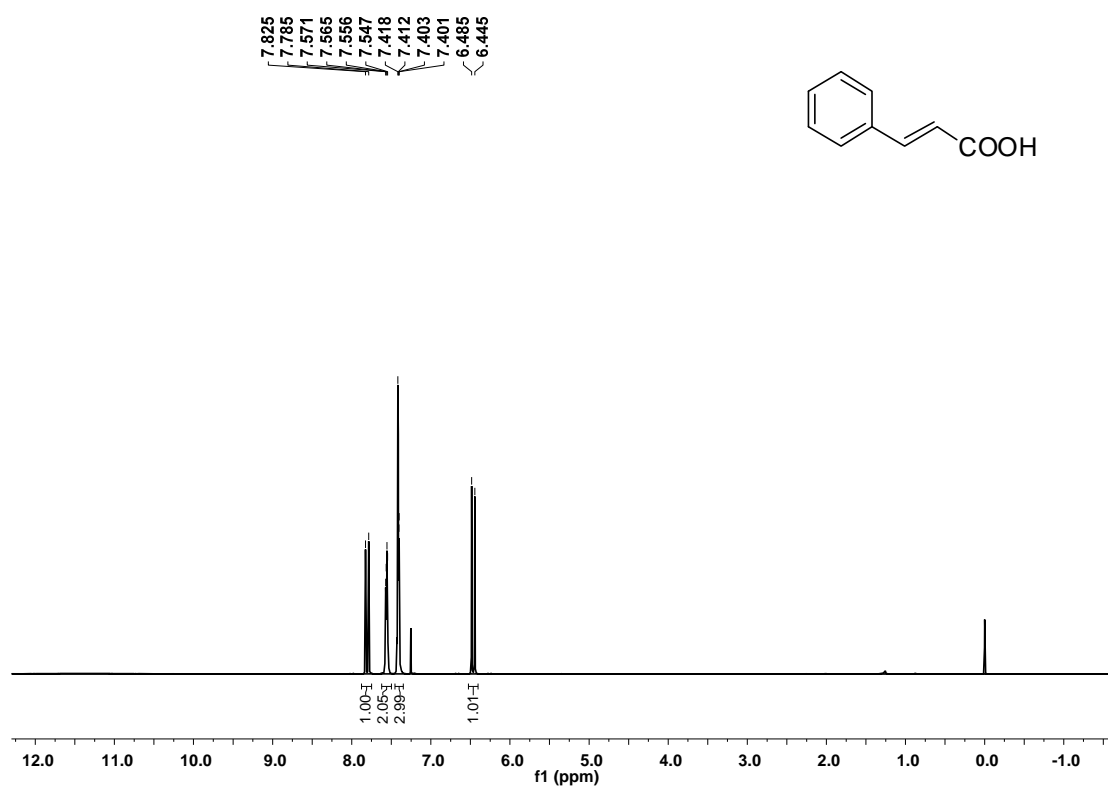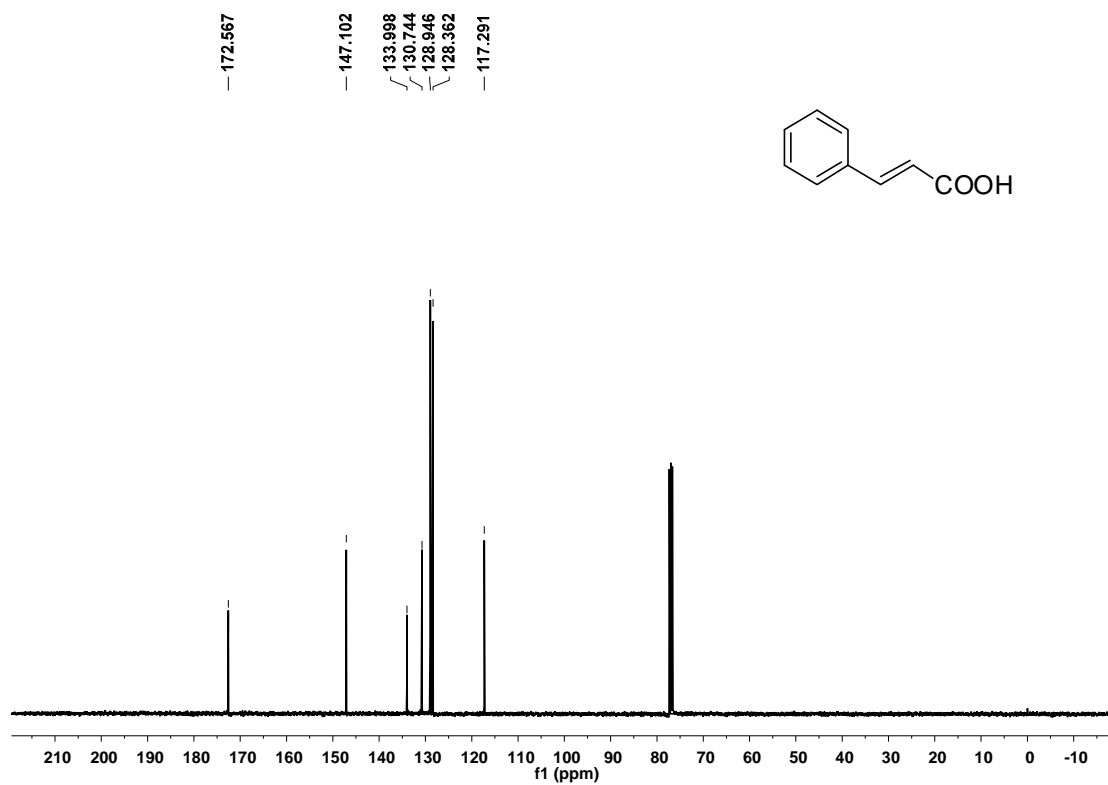

2g

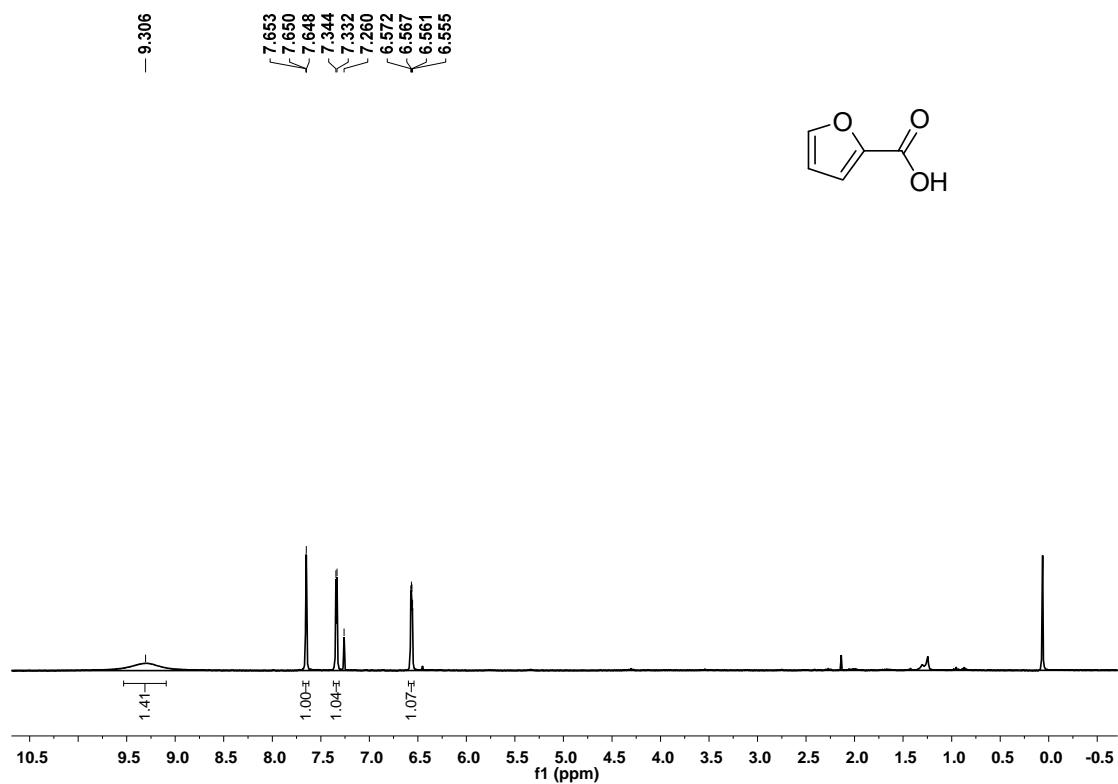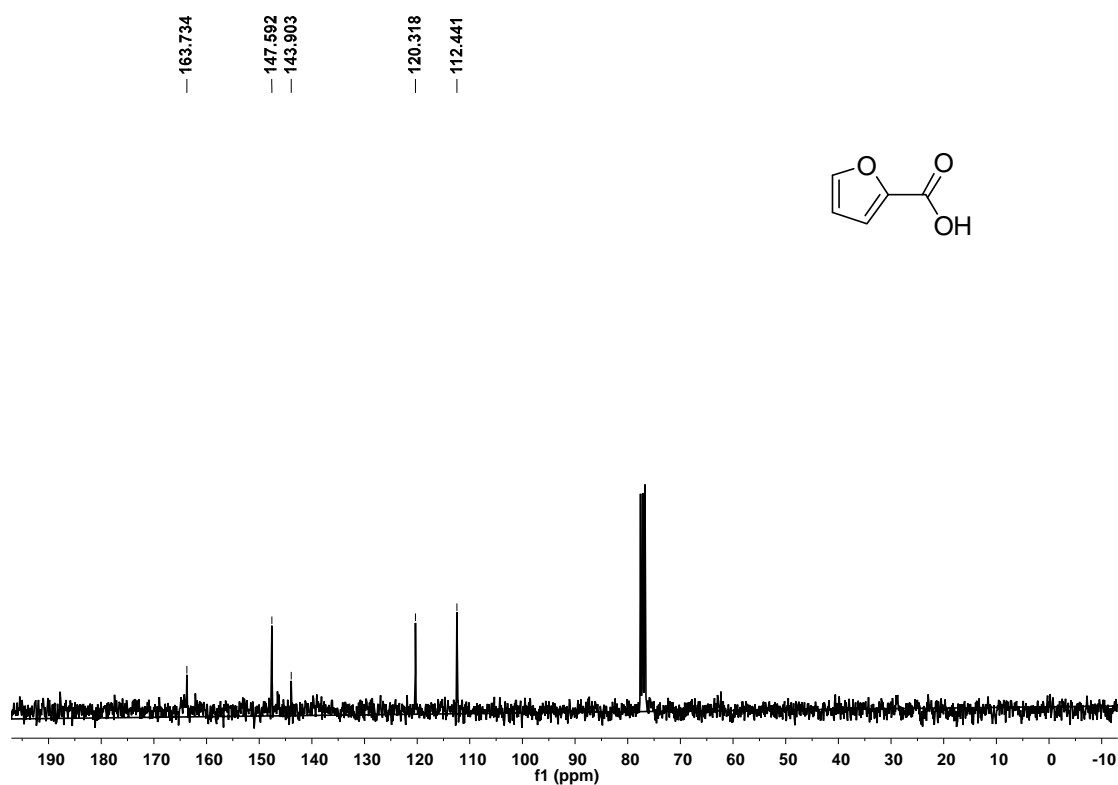

**2h**

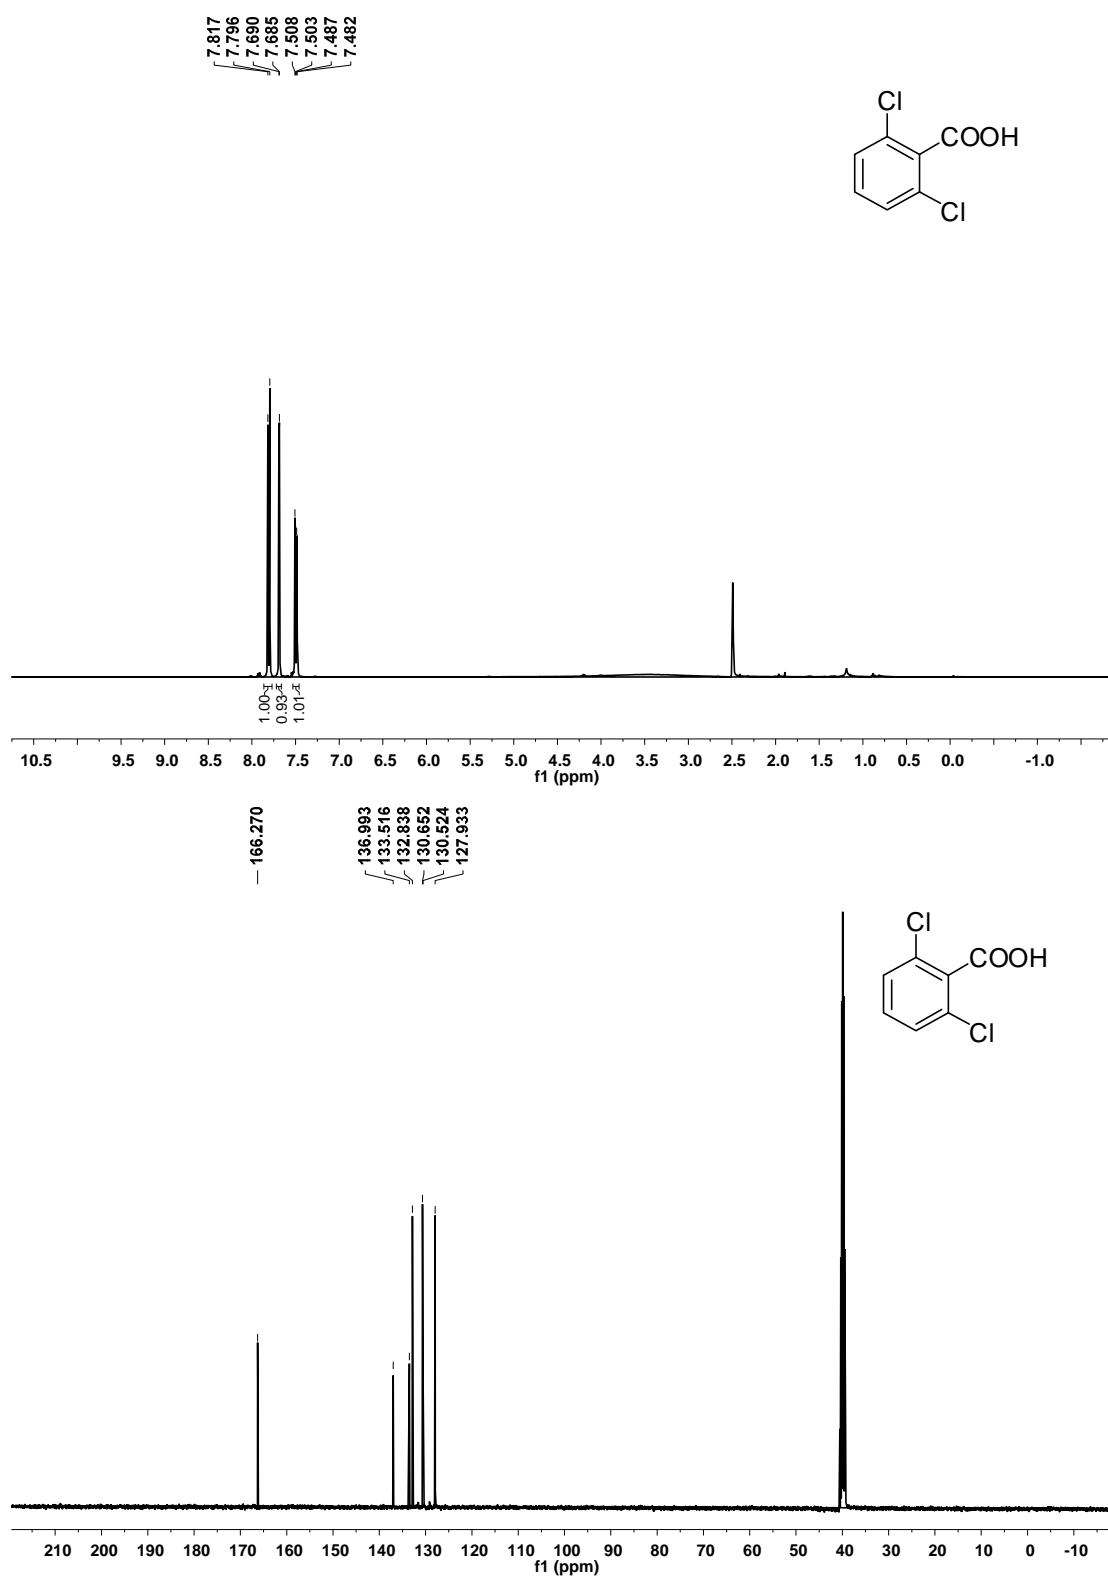

2i

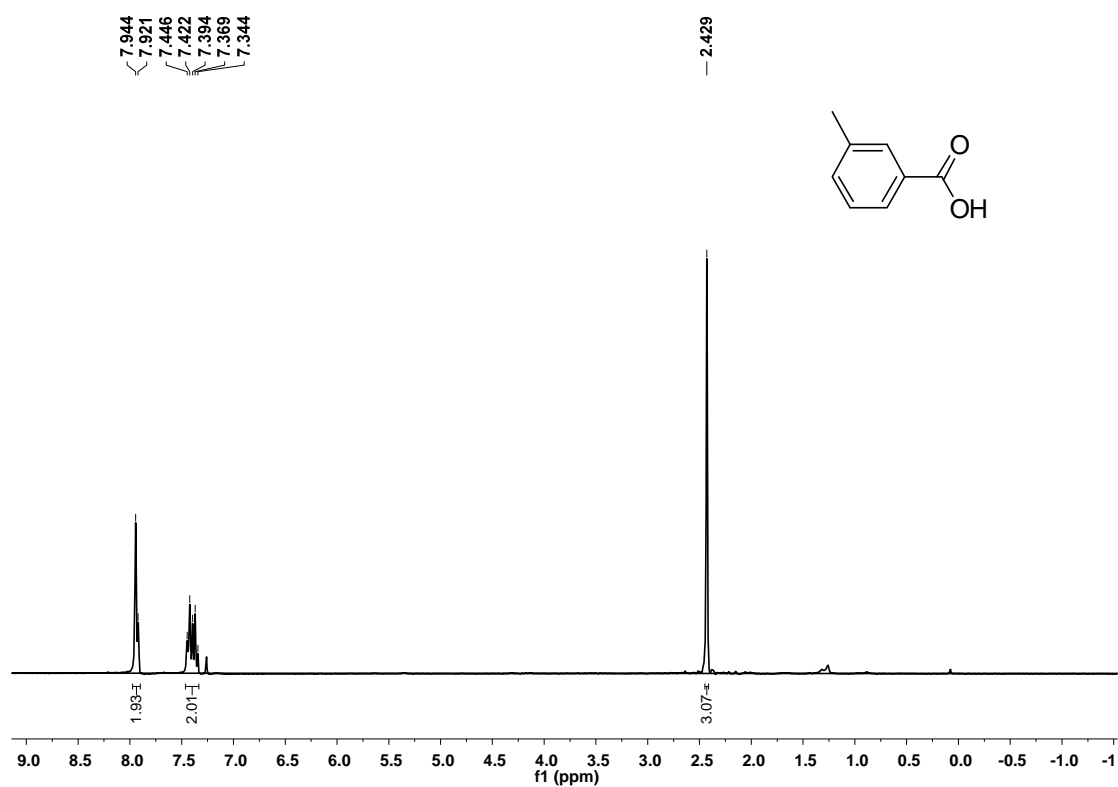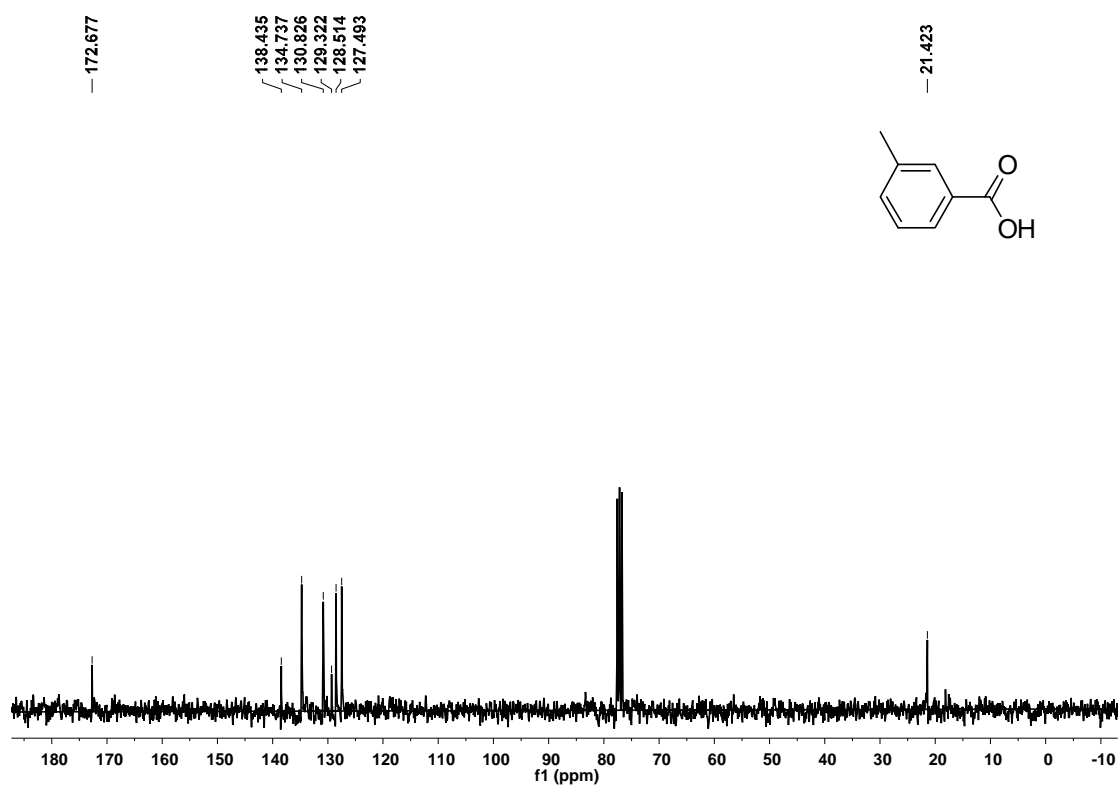

2j

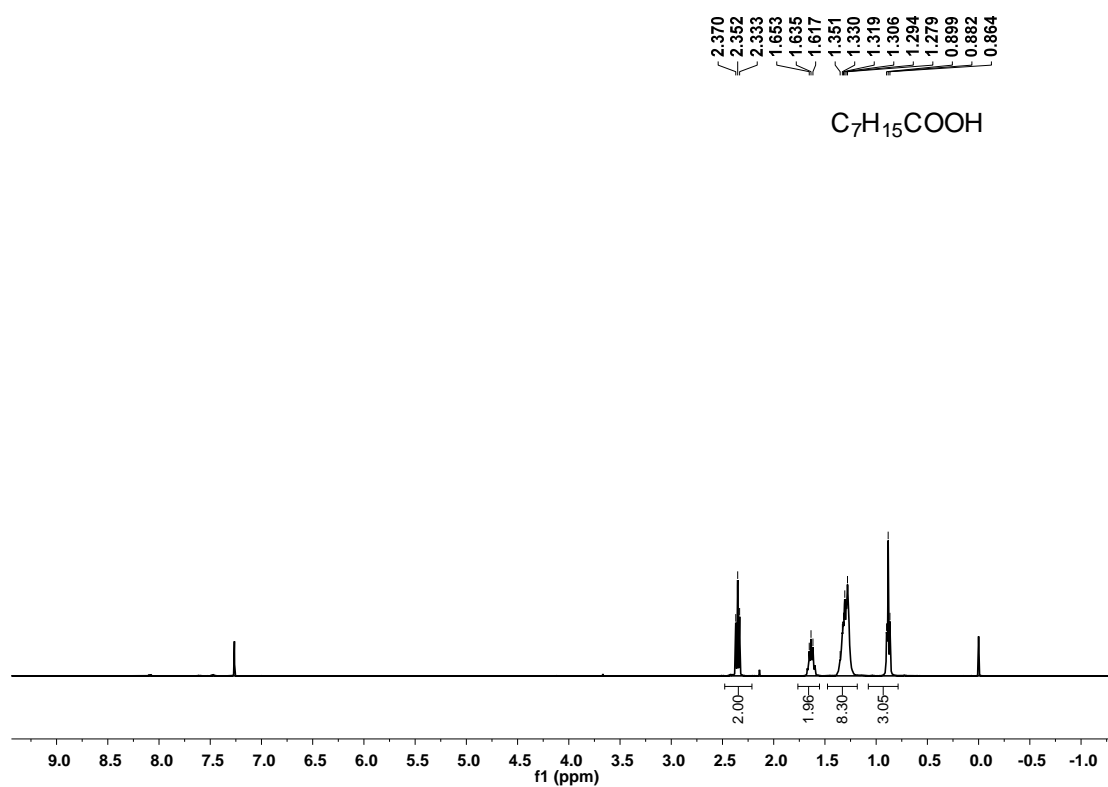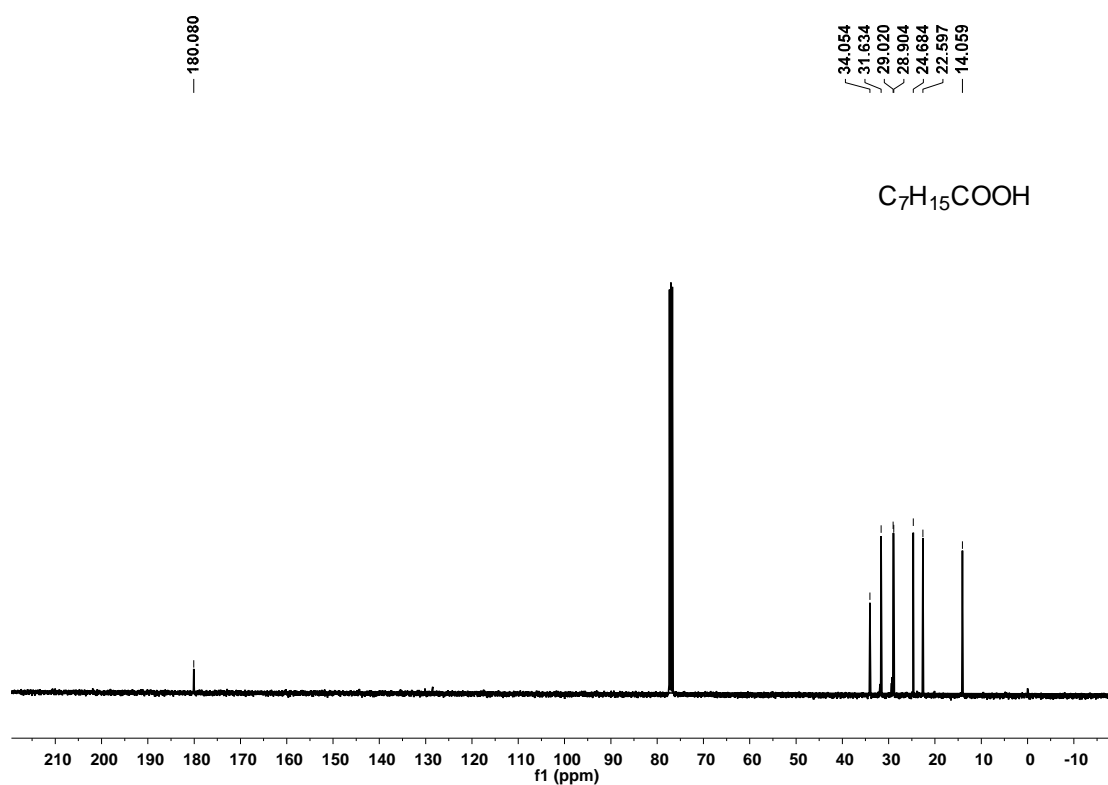

2k

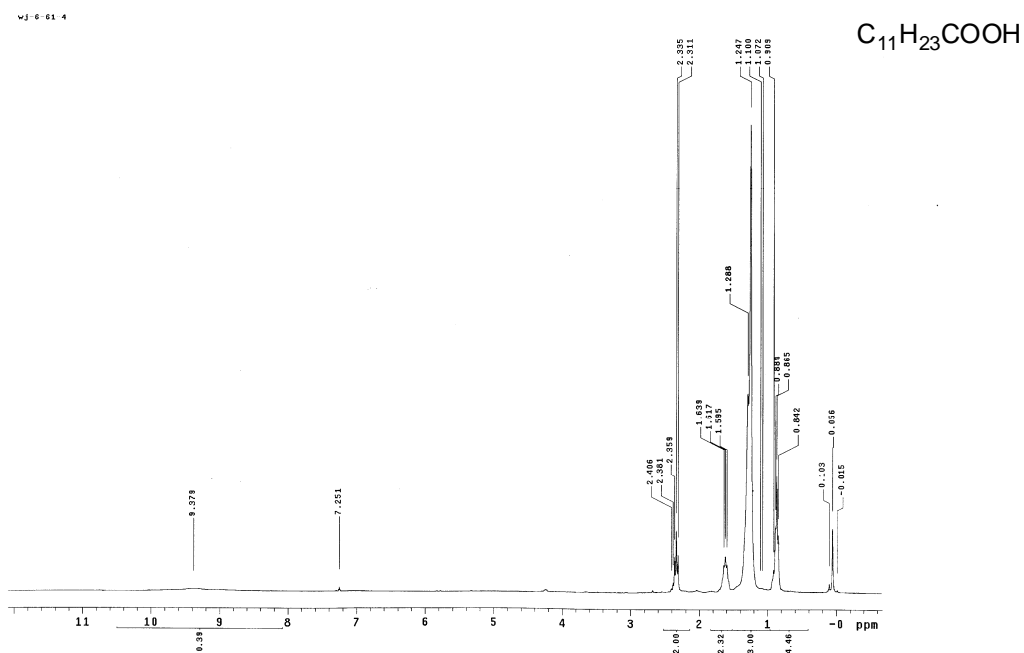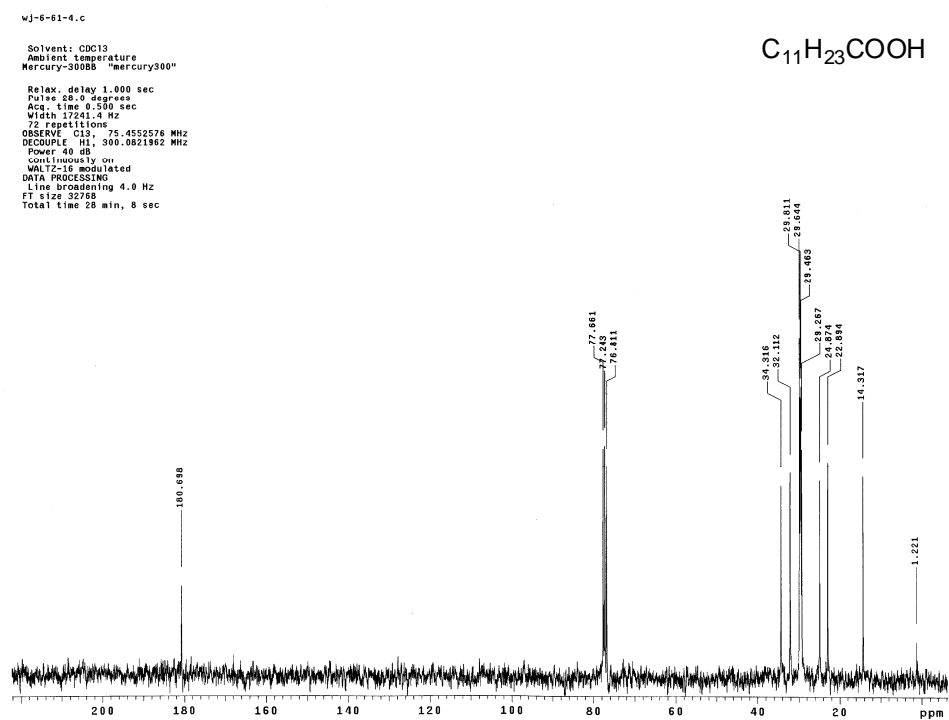

## References

- 1 P.-C. Chiang, J. W. Bode, *Org. Lett.* **2011**, *13*, 2422.
- 2 T. Ohishi, M. Nishiura, Z. Hou, *Angew. Chem. Int. Ed.* **2008**, *47*, 5792.
- 3 F. C. Lopez, A. Shankar, M. Thompson, B. Shealy, D. Locklear, T. Rawalpally, T. Cleary, C. Gagliardi, *Org. Process. Res. Dev.* **2005**, *9*, 1003.
- 4 A. T. Murray, P. Matton, N. W. G. Fairhurst, M. P. John, D. R. Carbery, *Org. Lett.* **2012**, *14*, 3656.
- 5 D. Yang, H. Yang, H. Fu, *Chem. Commun.* **2011**, *47*, 2348.
- 6 A.-K. C. Schmidt, C. B. W. Stark, *Org. Lett.* **2011**, *13*, 4164.
- 7 Y. Koshikari, A. Sakakura, K. Ishihara, *Org. Lett.* **2012**, *14*, 3194.
